# Supplementary material
Source: publisher figshare collection journal article supplement (https://gsapubs.figshare.com/ndownloader/files/34835985)
Supplement: Supplementary file 1 [file 34835985]

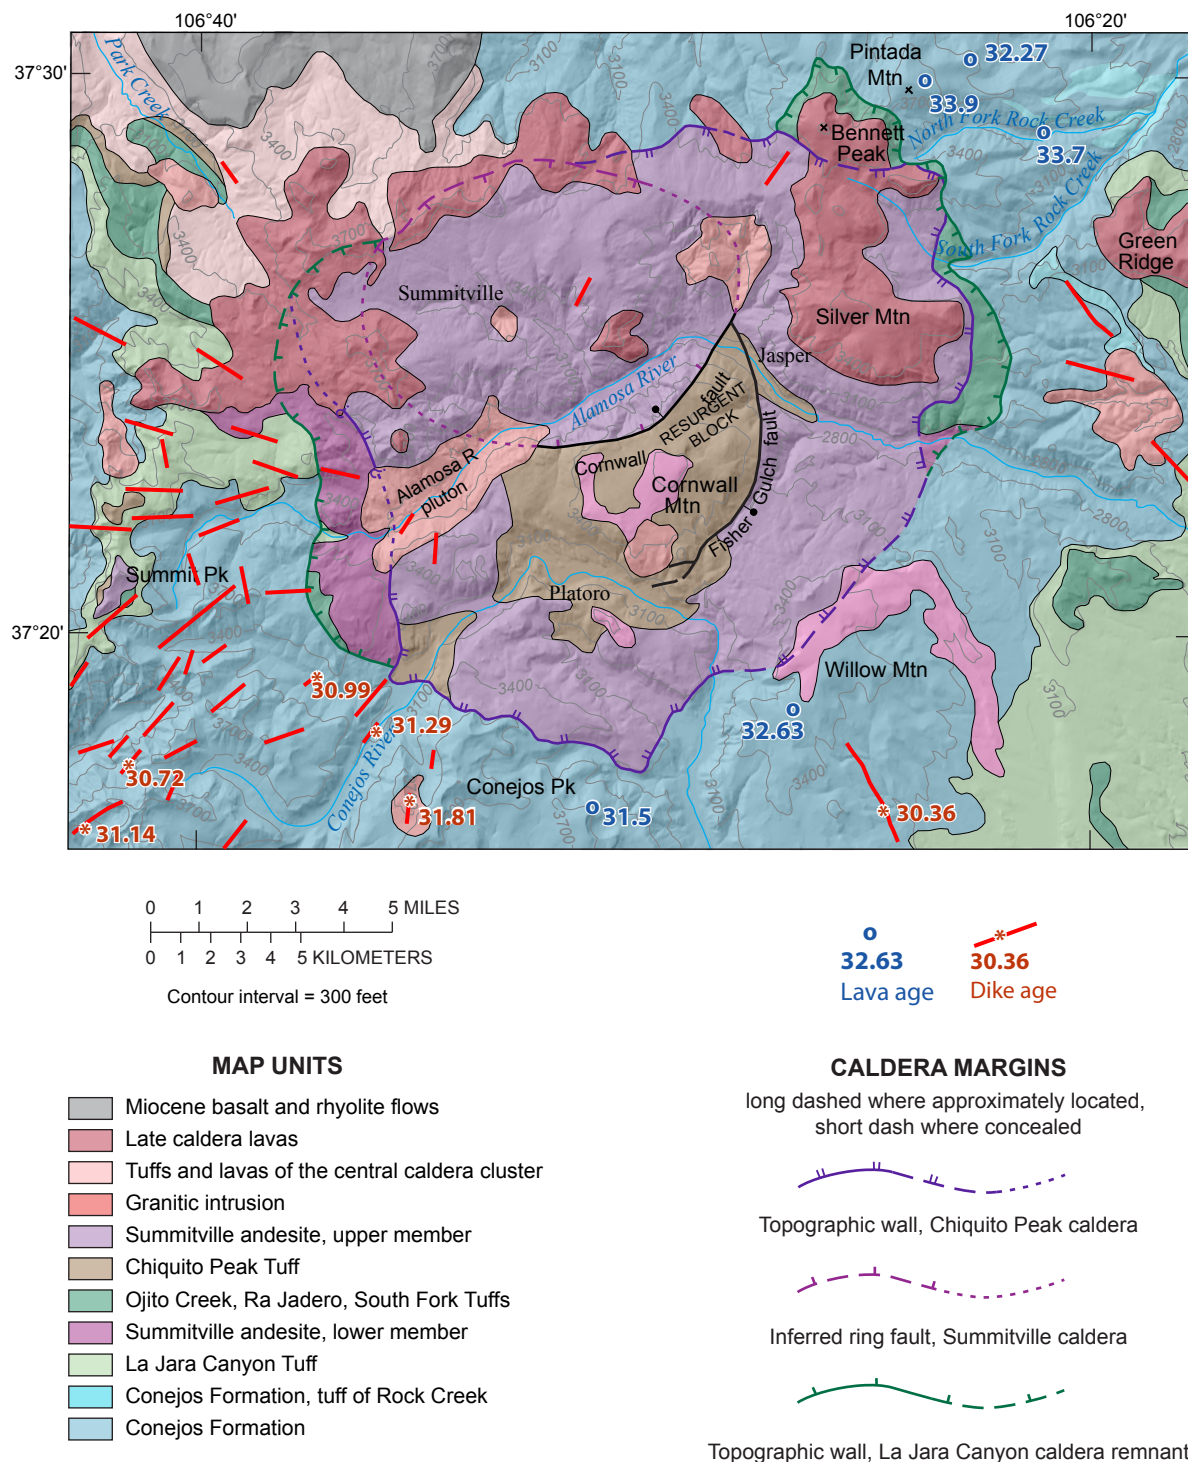

Fig, S1. Geologic map, showing ages of early volcanic rocks, in relation to the Platoro caldera complex. Figure modified from Lipman et al., 1996; data from Table S3
